# Supplementary material for: Deep Learning and Machine Learning with Grid Search to Predict Later Occurrence of Breast Cancer Metastasis Using Clinical Data
Source: MDPI journal article supplement (doi:10.3390/jcm11195772), 2022-09-29
Supplement: s1 [file s1]

**Table S1.** The variables of the LSM datasets

| Variables included          | Description                                                                | Values                                                                                            |
|-----------------------------|----------------------------------------------------------------------------|---------------------------------------------------------------------------------------------------|
| <i>race</i>                 | race of patient                                                            | white, black, Asian, American Indian or Alaskan native, native Hawaiian or other Pacific islander |
| <i>ethnicity</i>            | ethnicity of patient                                                       | not Hispanic, Hispanic                                                                            |
| <i>smoking</i>              | smoking history of patient                                                 | ex smoker, non smoker, cigarettes, chewing tobacco, cigar                                         |
| <i>alcohol usage</i>        | alcohol usage of patient                                                   | moderate, no use, use but nos (non otherwise specified), former user, heavy user                  |
| <i>family history</i>       | family history of cancer                                                   | cancer, no cancer, breast cancer, other cancer, cancer but nos                                    |
| <i>age_at_diagnosis</i>     | age at diagnosis of the disease                                            | 0-49, 50-69, >69                                                                                  |
| <i>menopausal_status</i>    | inferred menopausal status                                                 | pre, post                                                                                         |
| <i>side</i>                 | side of tumor                                                              | left, right                                                                                       |
| <i>TNEG</i>                 | triple negative status in terms of patient being ER, PR, and HER2 negative | yes, no                                                                                           |
| <i>ER</i>                   | estrogen receptor expression                                               | neg, pos, low pos                                                                                 |
| <i>ER_percent</i>           | percent of cell stain pos for ER receptors                                 | 0-20, 20-90, 90-100                                                                               |
| <i>PR</i>                   | progesterone receptor expression                                           | neg, pos, low pos                                                                                 |
| <i>PR_percent</i>           | percent of cell stain pos for PR receptors                                 | 0-20, 20-90, 90-100                                                                               |
| <i>P53</i>                  | whether P53 is mutated                                                     | neg, pos, low pos                                                                                 |
| <i>HER2</i>                 | HER2 expression                                                            | neg, pos                                                                                          |
| <i>t_tnm_stage</i>          | prime tumor stage in TNM system                                            | 0, 1, 2, 3, 4, IS, 1mic, X                                                                        |
| <i>n_tnm_stage</i>          | # of nearby cancerous lymph nodes                                          | 0, 1, 2, 3, 4, X                                                                                  |
| <i>stage</i>                | composite of size and # positive nodes                                     | 0, 1, 2, 3                                                                                        |
| <i>lymph_nodes_removed</i>  | number of lymph nodes removed                                              | 0-11, 12-22, > 22                                                                                 |
| <i>lymph_nodes_positive</i> | number of positive lymph nodes                                             | 0, 1-8, >8                                                                                        |
| <i>lymph_node_status</i>    | patient had any positive lymph nodes                                       | neg, pos                                                                                          |
| <i>histology</i>            | tumor histology                                                            | lobular, duct                                                                                     |
| <i>size</i>                 | size of tumor in mm                                                        | 0-32, 32-70, >70                                                                                  |
| <i>grade</i>                | grade of disease                                                           | 1, 2, 3                                                                                           |
| <i>invasive</i>             | whether tumor is invasive                                                  | yes, no                                                                                           |
| <i>histology2</i>           | tumor histology subtypes                                                   | IDC, DCIS, ILC, NC                                                                                |

|                                |                                           |                                                                      |
|--------------------------------|-------------------------------------------|----------------------------------------------------------------------|
| <i>invasive_tumor_location</i> | where invasive tumor is located           | mixed duct and lobular, duct, lobular, none                          |
| <i>DCIS_level</i>              | type of ductal carcinoma in situ          | solid, apocrine, cribriform, dcis, comedo, papillary, micropapillary |
| <i>re_excision</i>             | removal of an additional margin of tissue | yes, no                                                              |
| <i>surgical_margins</i>        | whether residual tumor                    | res. tumor, no res. tumor, no primary site surgery                   |
| <i>MRIs_60_surgery</i>         | MRIs within 60 days of surgery            | yes, no                                                              |

**Table S2:** Description of the ML hyperparameters and Their Values Tested (Notes: NB: Naïve bayes; LR: Logistic regression; DT: Decision tree; SVM: Support vector machine; LASSO: Least absolute shrinkage and selection operator; KNN: K-nearest neighbor; RF: Random forest; ADB: AdaBoost; XGB: XGBoost).

| Method       | Hyperparameter | Description                                                           | Values                                                    |
|--------------|----------------|-----------------------------------------------------------------------|-----------------------------------------------------------|
| Bernoulli NB | alpha          | Laplace smoothing parameter                                           | 1,2,3, ..., 499,500,700,1000                              |
|              | fit_prior      | Whether to learn class prior probabilities or not                     | True, False                                               |
|              | Binarize       | The threshold value of the binarization of sample features.           | 0, 1, 2, 3, 4, 5                                          |
| LR           | C              | Inverse of regularization strength ( $C=1/\lambda$ )                  | 0.0001-10000(300 numbers distributed evenly on log scale) |
|              | penalty        | Used to specify the norm used in the penalization                     | 'l2', 'none'                                              |
|              | solver         | Algorithm to use in the optimization problem                          | 'newton-cg', 'lbfgs', 'saga', 'sag'                       |
| DT           | criterion      | The function to measure the quality of a split                        | 'gini', 'entropy'                                         |
|              | splitter       | Used to control the randomness of dividing nodes in the decision tree | 'best', 'random'                                          |
|              | max_depth      | The maximum depth of the tree                                         | 3, 4, ..., 31, 32                                         |
|              | max_features   | Used to limit the number of features in the decision tree             | 'sqrt', 'log2', None                                      |

|     |                   |                                                                                                   |                                       |
|-----|-------------------|---------------------------------------------------------------------------------------------------|---------------------------------------|
|     | min_samples_split | The minimum number of samples required to split an internal node                                  | 0.1, 0.2, 0.3, 0.4, 0.6, 0.8          |
|     | min_samples_leaf  | The minimum number of samples required to be at a leaf node                                       | 1, 2                                  |
|     | class_weight      | Used to set different weights for positive and negative samples in the case of unbalanced samples | None, 'balanced'                      |
| SVM | C                 | Inverse of regularization strength ( $C=1/\lambda$ )                                              | $2^{-5}, 2^{-3}, \dots, 2^{15}$       |
|     | gamma             | Kernel coefficient                                                                                | $2^{-15}, 2^{-11}, \dots, 2^3$        |
|     | kernel            | Specifies the kernel type to be used in the algorithm                                             | 'rbf', 'linear', 'sigmoid', 'poly'    |
|     | penalty           | Used to specify the norm used in the penalization                                                 | l1                                    |
|     | solver            | Algorithm to use in the optimization problem                                                      | 'liblinear', 'saga'                   |
| KNN | n_neighbors       | Number of neighbors                                                                               | 1, 2, ..., 51, 100, 200, 300          |
|     | weights           | Weights of each neighbor                                                                          | 'uniform', 'distance'                 |
|     | algorithm         | Algorithm used to compute the nearest neighbors                                                   | 'kd_tree', 'brute'                    |
|     | leaf_size         | Leaf size passed to KDTree                                                                        | 10, 14, ..., 38                       |
|     | metric            | The method of calculating tree distance                                                           | 'euclidean', 'manhattan', 'chebyshev' |
| RF  | n_estimators      | The number of trees in the forest.                                                                | 10, 50, 100, 200, 300                 |
|     | criterion         | Same as DT                                                                                        | 'gini', 'entropy'                     |
|     | min_samples_split | Same as DT                                                                                        | 0.1, 0.2, 0.3, 0.4, 0.6, 0.8          |
|     | min_samples_leaf  | Same as DT                                                                                        | 1, 2                                  |
|     | max_depth         | Same as DT                                                                                        | 1, 2, ..., 29, 30                     |
|     | max_leaf_nodes    | Same as DT                                                                                        | None                                  |
|     | max_features      | Same as DT                                                                                        | 'sqrt', 'log2', None                  |
| ADA | algorithm         | The type of boosting algorithm                                                                    | SAMME.R                               |
|     | n_estimators      | The maximum number of estimators at which boosting is terminated                                  | 100, 10                               |
|     | learning_rate     | Weight applied to each classifier at each boosting iteration                                      | 0.002                                 |
| XGB | gamma             | Minimum loss reduction required to make a further partition on a leaf node of the tree            | 0, 0.01, 0.1, 0.3, 0.5, 0.9           |

|  |                  |                                                            |                           |
|--|------------------|------------------------------------------------------------|---------------------------|
|  | learning_rate    | Step size shrinkage used in update to prevents overfitting | 0.01, 0.05, 0.1, 0.5, 0.9 |
|  | n_estimators     | The number of boosting stages to perform                   | 100                       |
|  | subsample        | The subsample is the sample proportion for the training    | 0.6, 0.7, 0.8, 0.9        |
|  | colsample_bytree | Colsample bytree is the sampling ratio of the feature      | 0.6, 0.7, 0.9             |
|  | max_depth        | The maximum depth of the individual regression estimators  | 3, 4, ..., 30, 31         |

**Table S3:** Significance test results: one-tailed (greater) Wilcoxon rank sum tests

| X, Y               |         | DNN, NB       | DNN, LR       | DNN, DT       | DNN, LASSO    | DNN, SVM      | DNN, KNN      | DNN, RF       | ADB, DNN      | DNN, XGB      |
|--------------------|---------|---------------|---------------|---------------|---------------|---------------|---------------|---------------|---------------|---------------|
| 5-year Metastasis  | W       | 19            | 11            | 16            | 11            | 18            | 6             | 7             | 11            | 6             |
|                    | p-value | 0.111         | 0.655         | 0.274         | 0.655         | 0.155         | 0.925         | 0.889         | 0.655         | 0.925         |
|                    | 95 % CI | [-0.0174 Inf] | [-0.0269 Inf] | [-0.0112 Inf] | [-0.0254 Inf] | [-0.0057 Inf] | [-0.0453 Inf] | [-0.0463 Inf] | [-0.0388 Inf] | [-0.0520 Inf] |
| 10-year Metastasis | W       | 10            | 19            | 19            | 22            | 22            | 12            | 8             | 14            | 5             |
|                    | p-value | 0.726         | 0.111         | 0.111         | 0.028         | 0.028         | 0.579         | 0.843         | 0.421         | 0.952         |

| 15-year Metastasis |         |               |       |       |       |       |       |       |       |       |
|--------------------|---------|---------------|-------|-------|-------|-------|-------|-------|-------|-------|
|                    | 95 % CI |               |       |       |       |       |       |       |       |       |
|                    | W       | 24            | 9     | 22    | 9     | 9     | 20    | 19    | 6     | 20    |
|                    | p-value | 0.011         | 0.799 | 0.030 | 0.799 | 0.799 | 0.071 | 0.104 | 0.929 | 0.071 |
|                    |         | 95 % CI       |       |       |       |       |       |       |       |       |
|                    |         | [0.0291 Inf]  |       |       |       |       |       |       |       |       |
|                    |         | [-0.0555 Inf] |       |       |       |       |       |       |       |       |
|                    |         | [0.0013 Inf]  |       |       |       |       |       |       |       |       |
|                    |         | [-0.0505 Inf] |       |       |       |       |       |       |       |       |
|                    |         | [-0.0529 Inf] |       |       |       |       |       |       |       |       |
|                    |         | [-0.0012 Inf] |       |       |       |       |       |       |       |       |
|                    |         | [-0.0026 Inf] |       |       |       |       |       |       |       |       |
|                    |         | [-0.1120 Inf] |       |       |       |       |       |       |       |       |
|                    |         | [-0.0017 Inf] |       |       |       |       |       |       |       |       |

**Table S4:** Significance test results: one-tailed (less) Wilcoxon rank sum tests

| X, Y        |         | DNN, NB       | DNN, LR       | DNN, DT       | DNN, LASSO    | DNN, SVM      | DNN, KNN      | DNN, RF       | ADB, DNN      | DNN, XGB      |
|-------------|---------|---------------|---------------|---------------|---------------|---------------|---------------|---------------|---------------|---------------|
| 5-year BCM  | W       | 19            | 11            | 16            | 11            | 18            | 6             | 7             | 11            | 6             |
|             | p-value | 0.925         | 0.421         | 0.790         | 0.421         | 0.889         | 0.111         | 0.155         | 0.421         | 0.111         |
|             | 95 % CI | [-Inf 0.0583] | [-Inf 0.0252] | [-Inf 0.0380] | [-Inf 0.0241] | [-Inf 0.0735] | [-Inf 0.0145] | [-Inf 0.0032] | [-Inf 0.0223] | [-Inf 0.0041] |
| 10-year BCM | W       | 10            | 19            | 19            | 22            | 22            | 12            | 8             | 14            | 5             |
|             | p-value | 0.345         | 0.925         | 0.925         | 0.984         | 0.984         | 0.500         | 0.210         | 0.655         | 0.075         |

[illegible]
